# Supplementary material for: Anti-Inflammatory Phenolic Acid Esters from the Roots and Rhizomes of Notopterygium incisium and Their Permeability in the Human Caco-2 Monolayer Cell Model
Source: PubMed Central journal article supplement (PMC6152638; doi:10.3390/molecules22060935), 2017-06-04
Supplement: molecules-22-00935-s001.pdf [file molecules-22-00935-s001.pdf]

## Supplementary Material:

# Anti-Inflammatory Phenolic Acid Esters from the Roots and Rhizomes of *Notopterygium incisum* and Their Permeability in the Human Caco-2 Monolayer Cell Model

Xiu-Wen Wu, Wei Wei, Xiu-Wei Yang\*, You-Bo Zhang, Wei Xu, Yan-Fang Yang, Guo-Yue Zhong, Hong-Ning Liu, Shi-Lin Yang

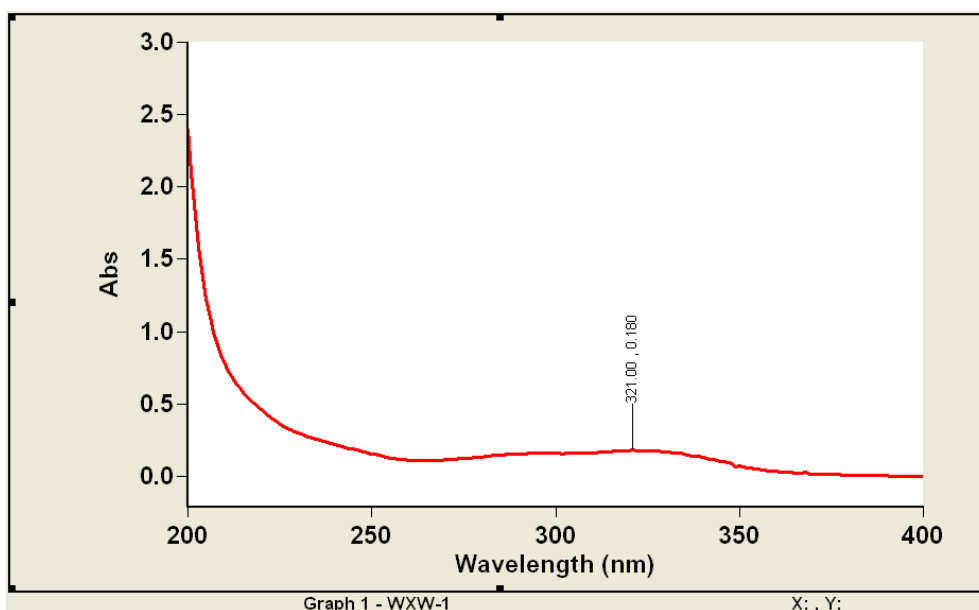

Figure S1. UV spectrum of 1 in MeOH.

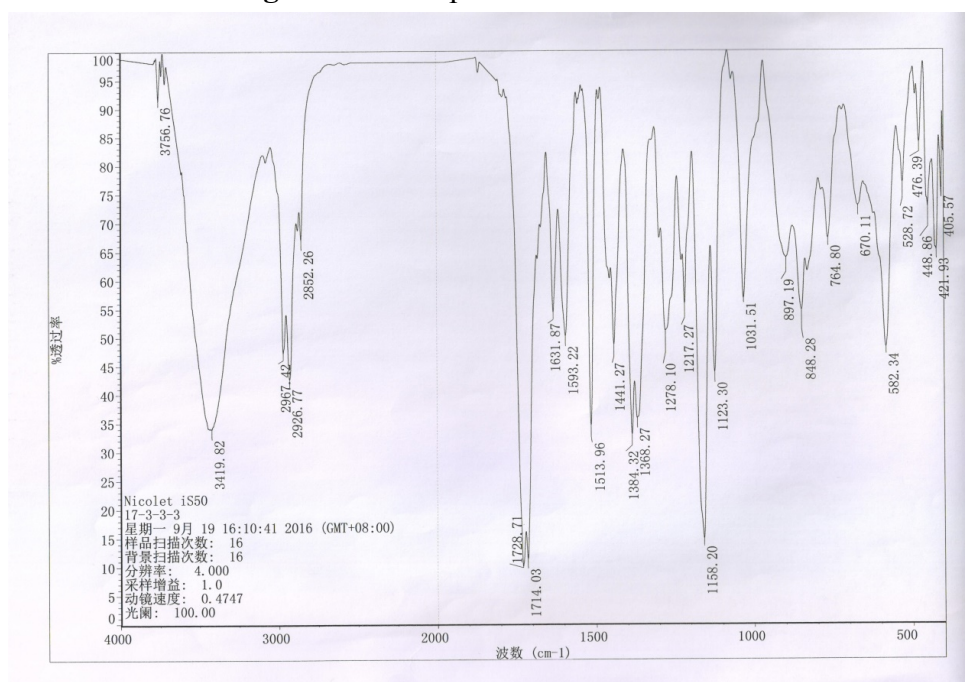

Figure S2. IR spectrum of 1.

### Elemental Composition Report

Page 1

#### Single Mass Analysis

Tolerance = 5.0 PPM / DBE: min = -1.5, max = 50.0  
 Element prediction: Off  
 Number of isotope peaks used for i-FIT = 3

Monoisotopic Mass, Even Electron Ions

92 formula(e) evaluated with 1 results within limits (up to 50 closest results for each mass)

Elements Used:

C: 0-100 H: 0-200 O: 0-50 Na: 0-1

24-Nov-2015

Xevo G2 Q-TOF/YCA166#

17-3-3 NEG 13 (0.237) Cm (11:15-(2:6+27:53))

Waters  
 TOF MS ES-  
 1.45e+006

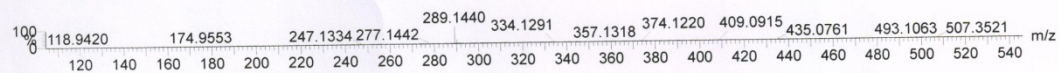

Minimum: -1.5  
 Maximum: 50.0

| Mass     | Calc. Mass | mDa | PPM | DBE | i-FIT | Norm | Conf (%) | Formula    |
|----------|------------|-----|-----|-----|-------|------|----------|------------|
| 289.1440 | 289.1440   | 0.0 | 0.0 | 7.5 | 359.3 | n/a  | n/a      | C17 H21 O4 |

Figure S3. HR-ESI-MS spectrum of **1**.

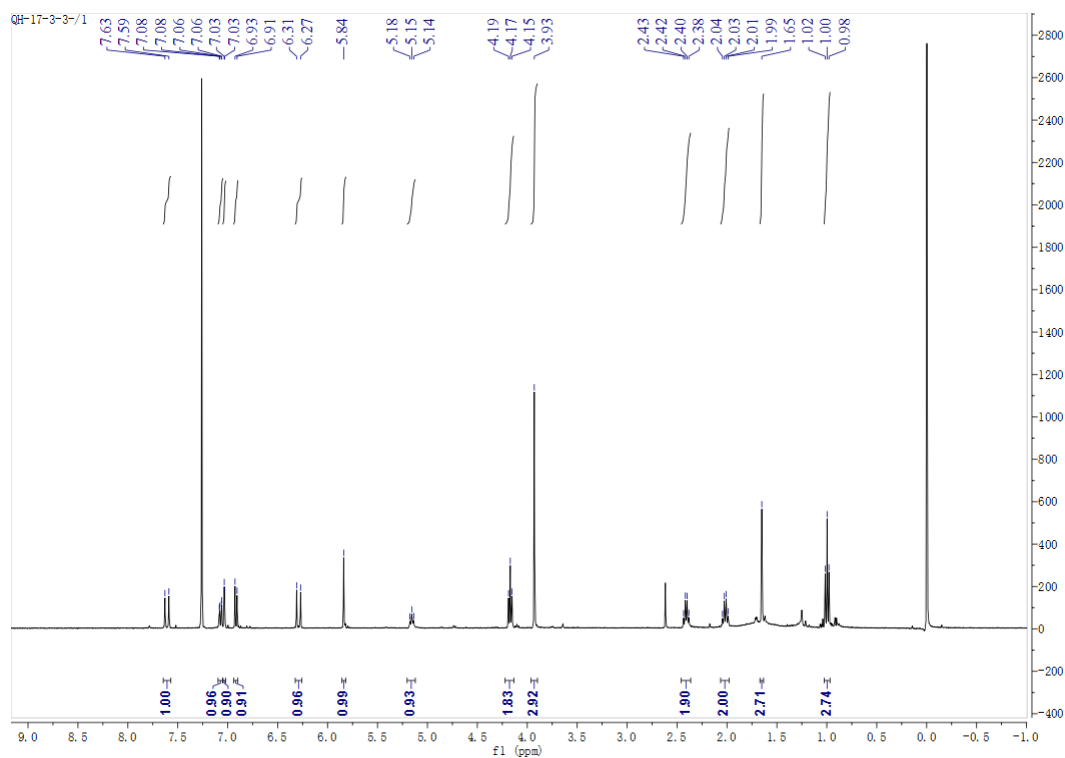

Figure S4. <sup>1</sup>H NMR spectrum of **1** in CDCl<sub>3</sub>.

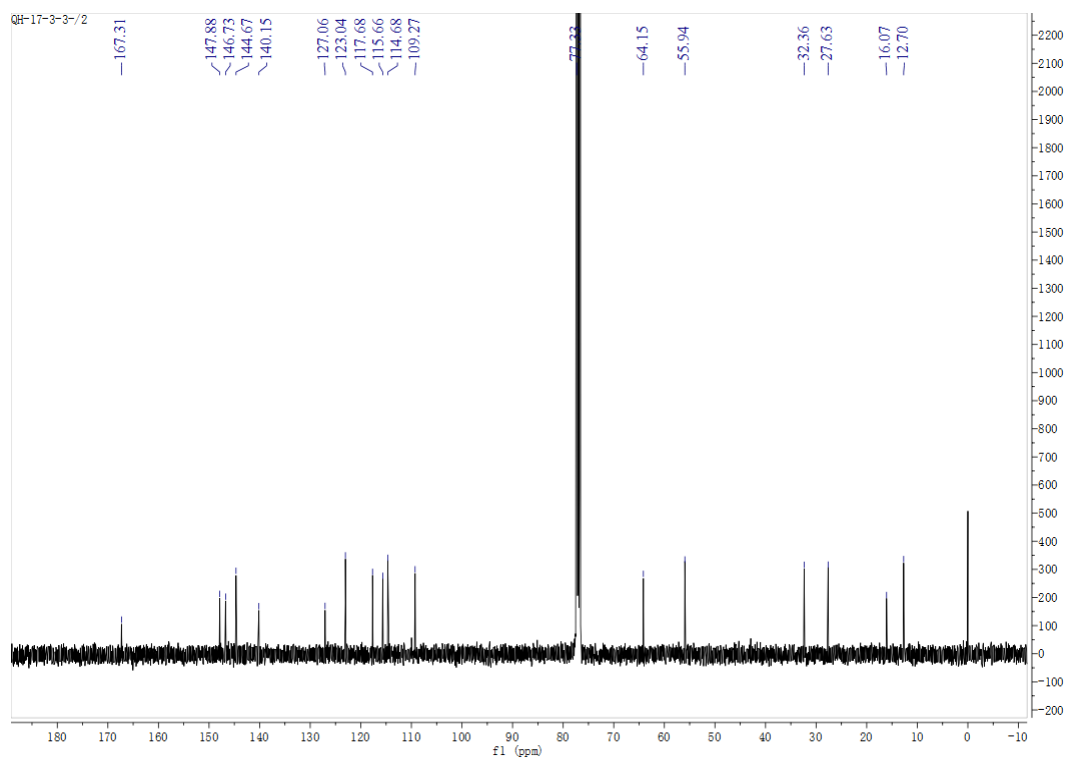

**Figure S5.**  $^{13}\text{C}$  NMR spectrum of **1** in  $\text{CDCl}_3$ .

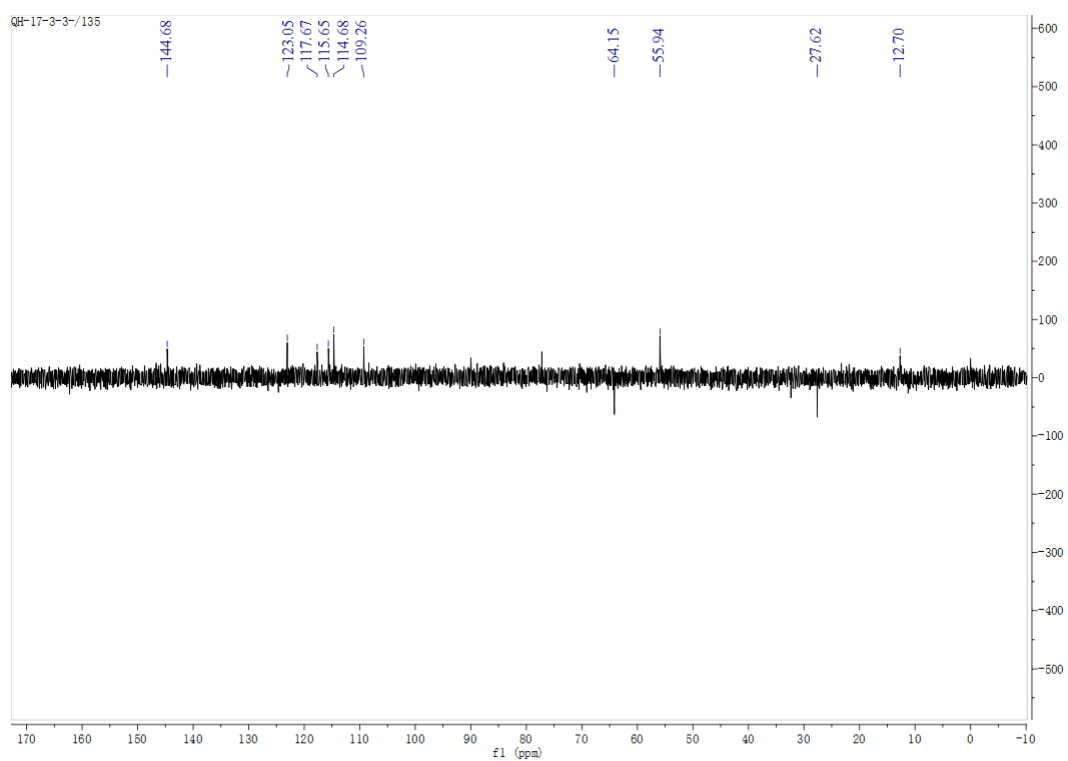

**Figure S6.** DEPT 135 spectrum of **1**  $\text{CDCl}_3$ .

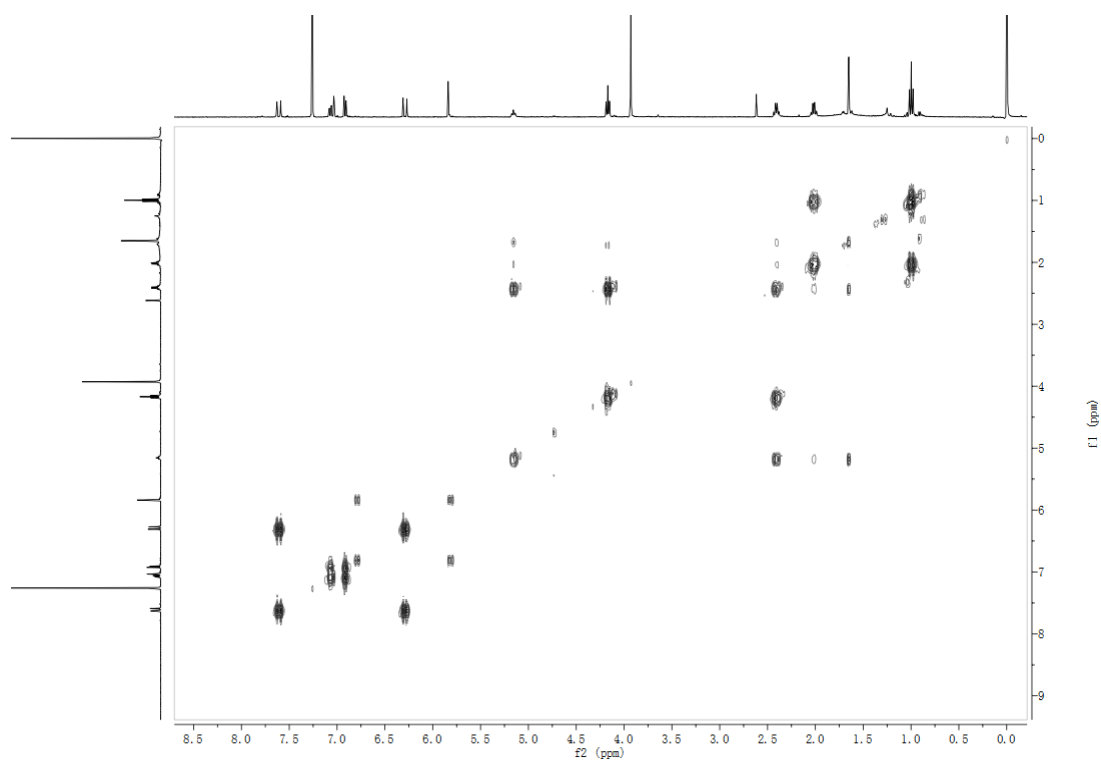

**Figure S7.**  $^1\text{H}$ - $^1\text{H}$  COSY spectrum of **1**  $\text{CDCl}_3$ .

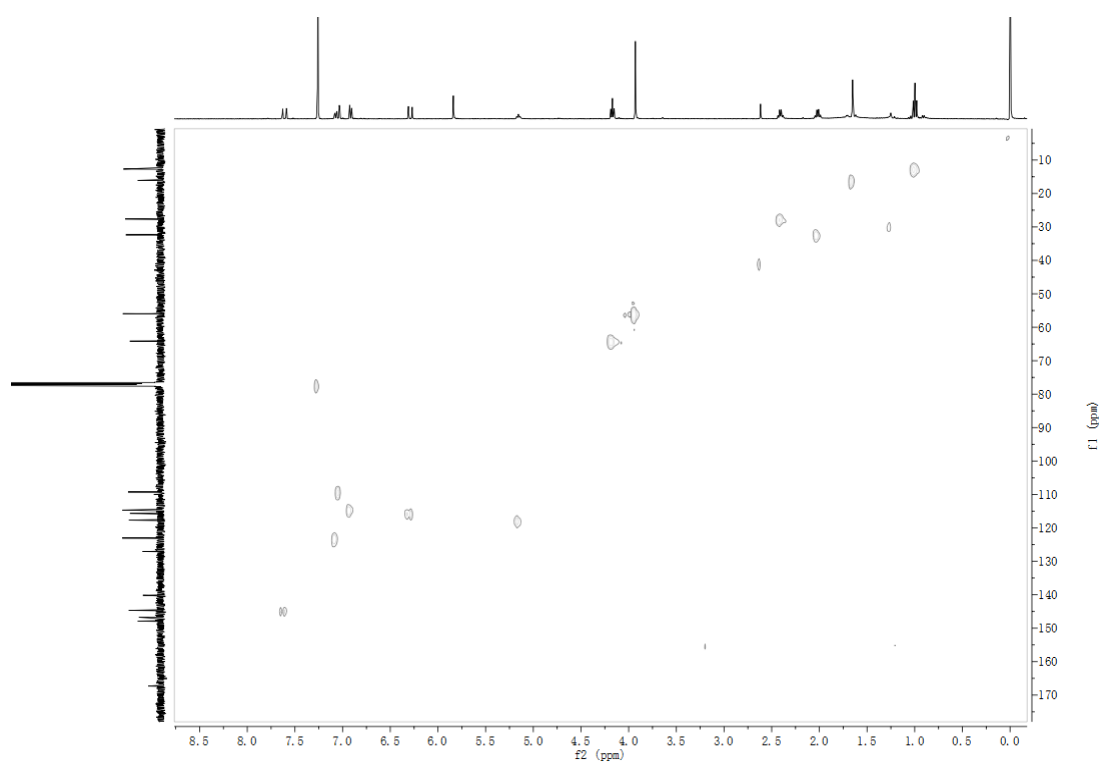

**Figure S8.** HSQC spectrum of **1**  $\text{CDCl}_3$ .

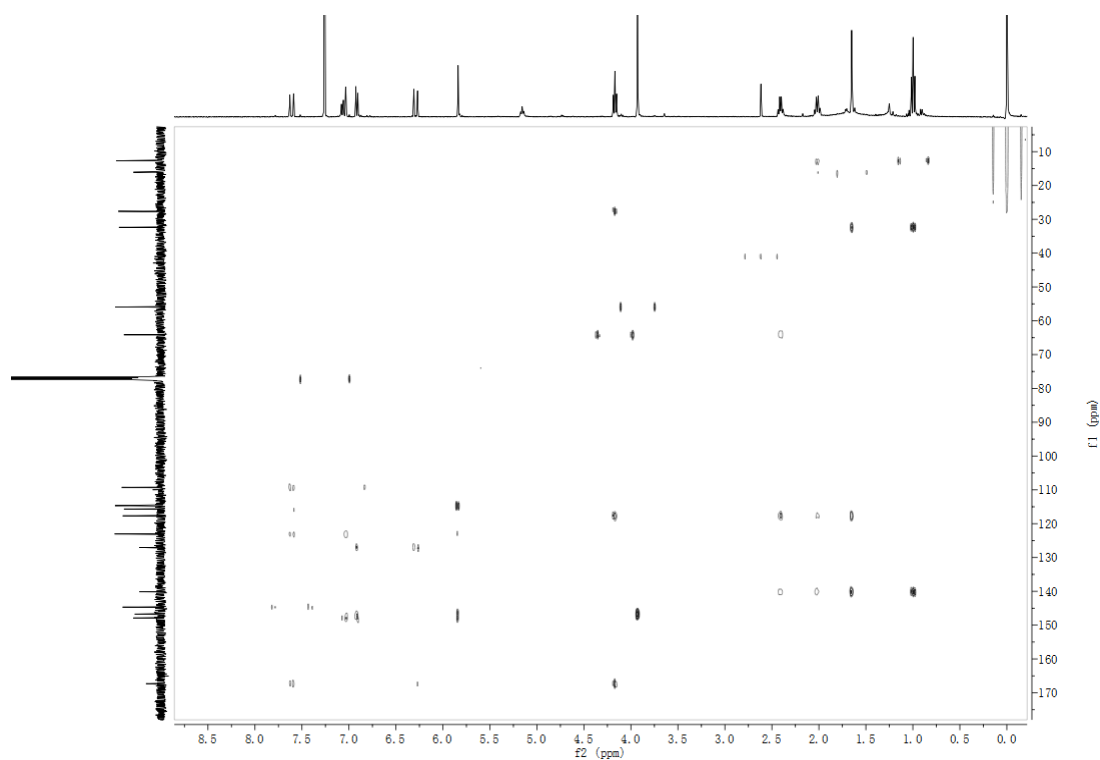

**Figure S9.** HMBC spectrum of **1** CDCl<sub>3</sub>.

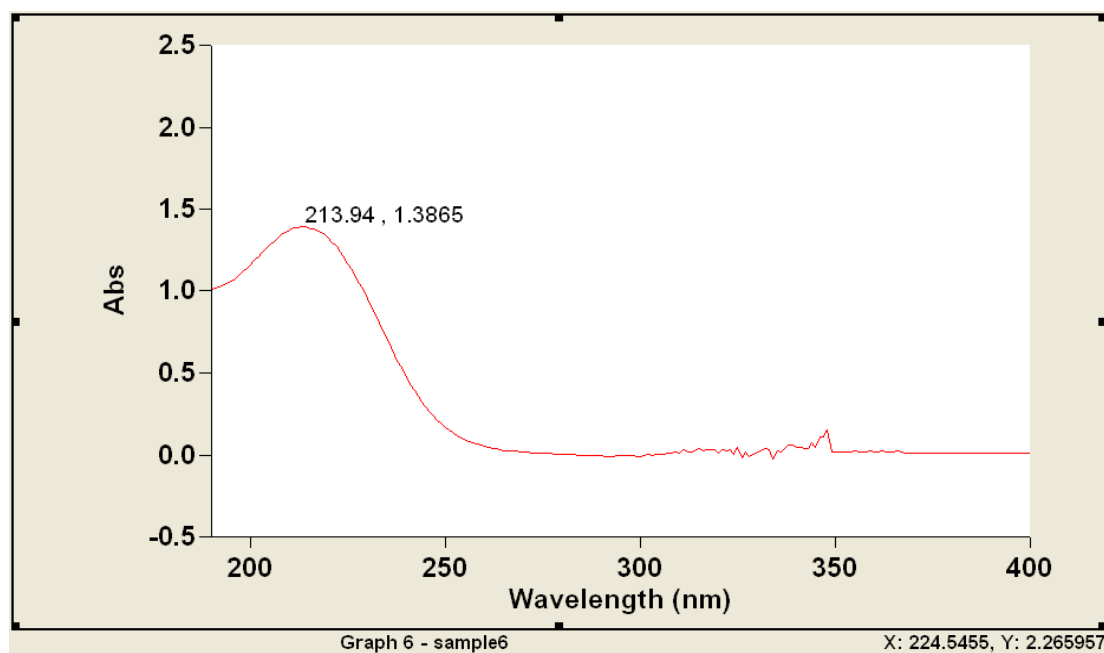

**Figure S10.** UV spectrum of **8** in MeOH.

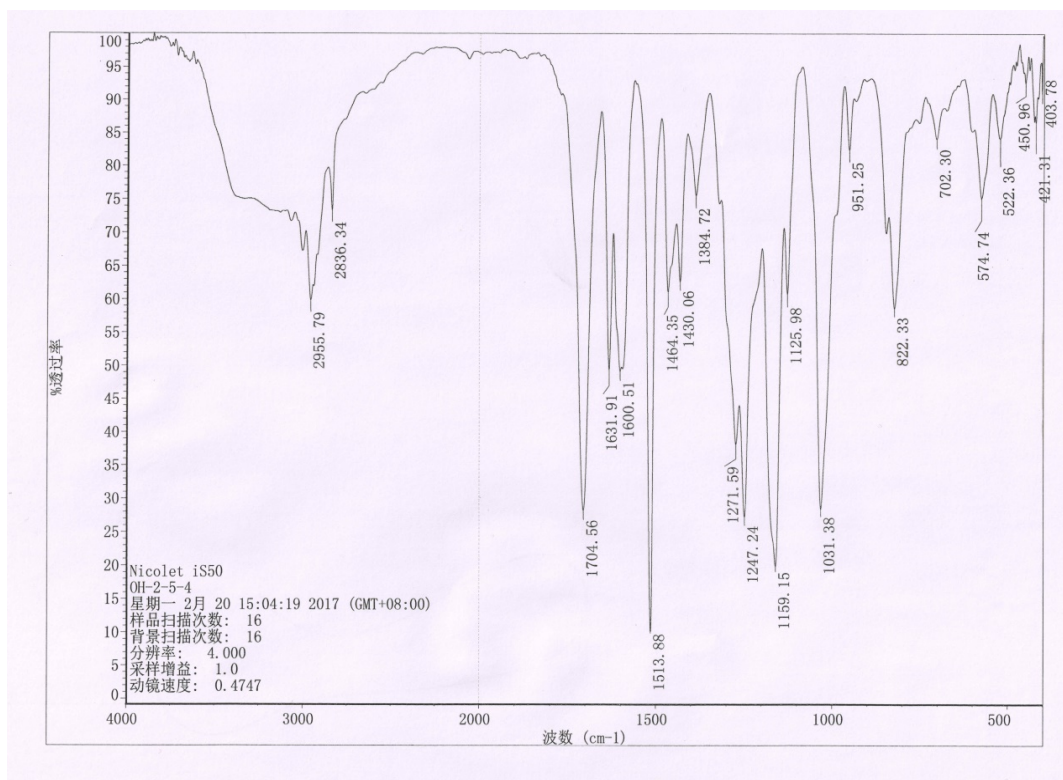

Figure S11. IR spectrum of **8**.

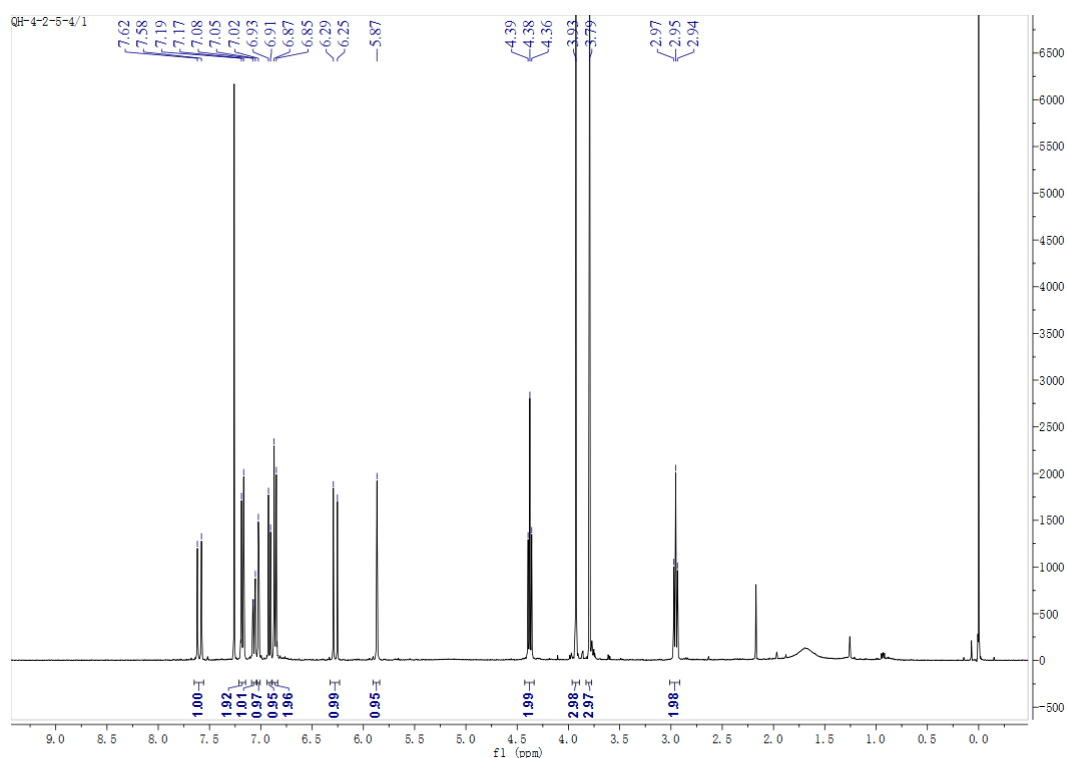

Figure S12. <sup>1</sup>H NMR spectrum of **8** in CDCl<sub>3</sub>.

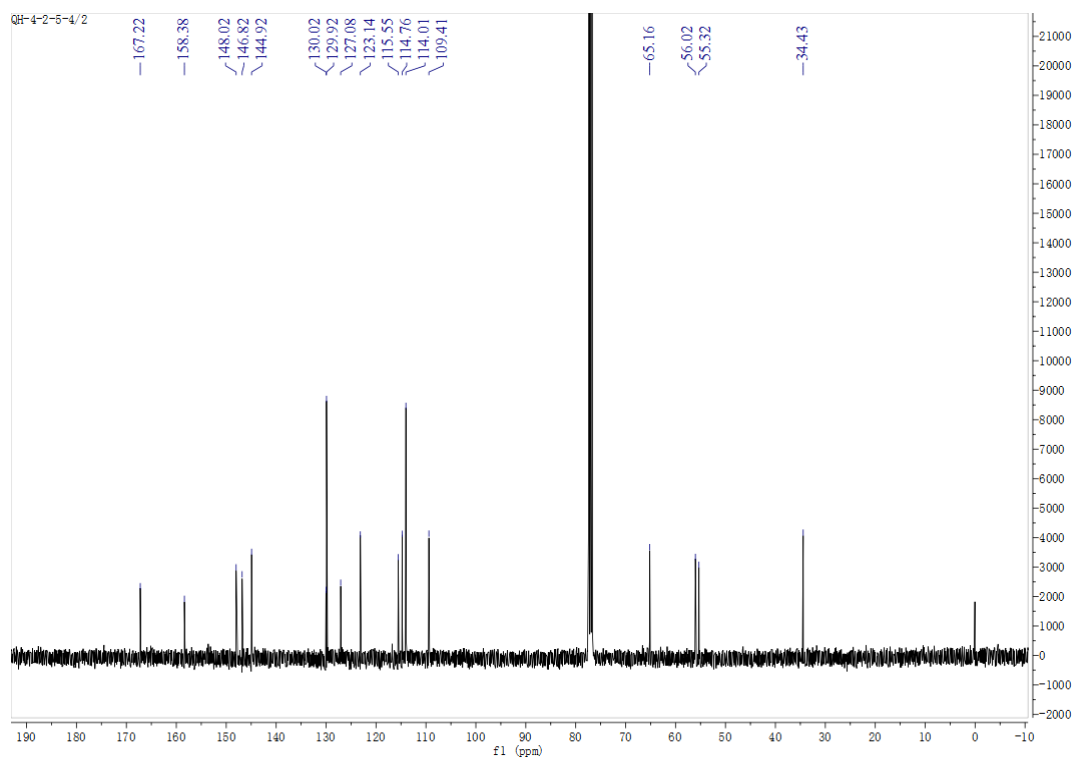

Figure S13.  $^{13}\text{C}$  NMR spectrum of **8** in  $\text{CDCl}_3$ .

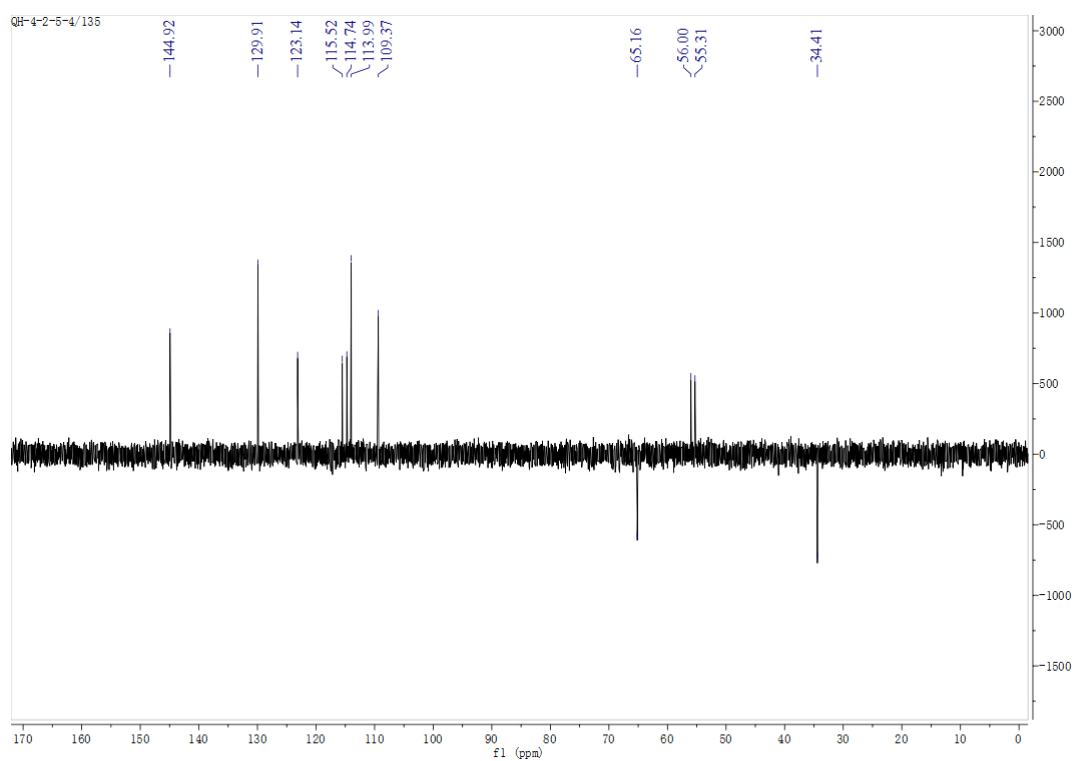

Figure S14. DEPT 135 spectrum of **8** in  $\text{CDCl}_3$ .

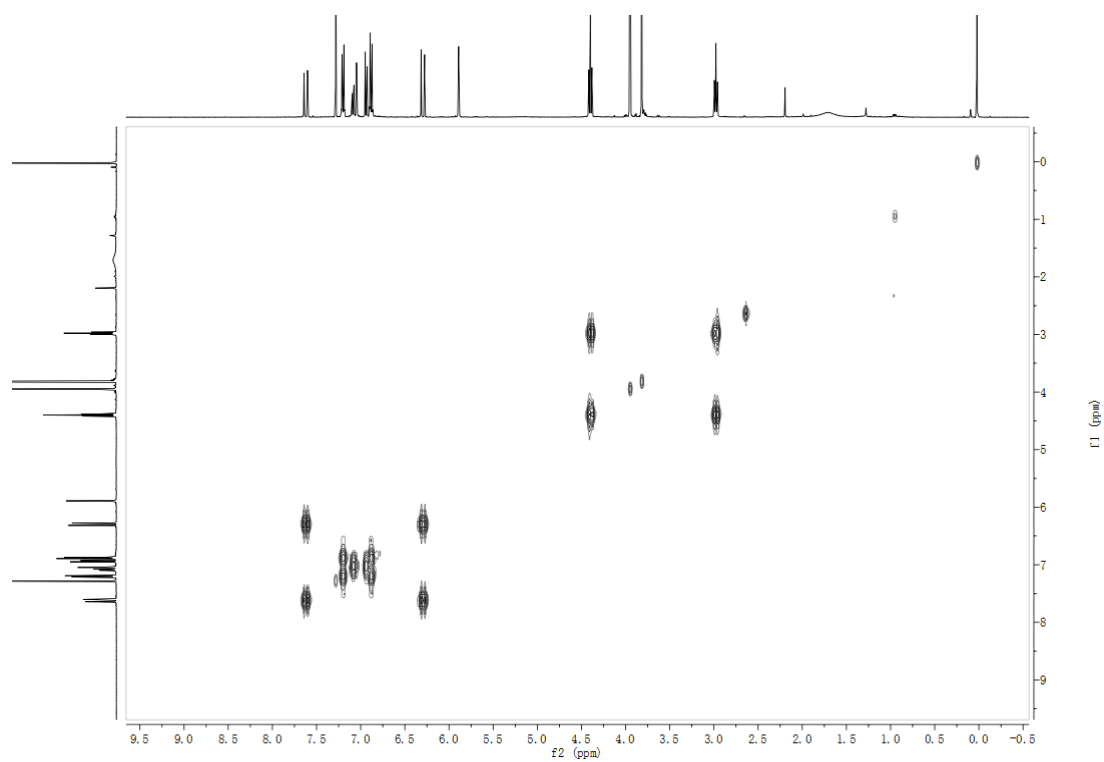

**Figure S15.**  $^1\text{H}$ - $^1\text{H}$  COSY spectrum of **8** in  $\text{CDCl}_3$ .

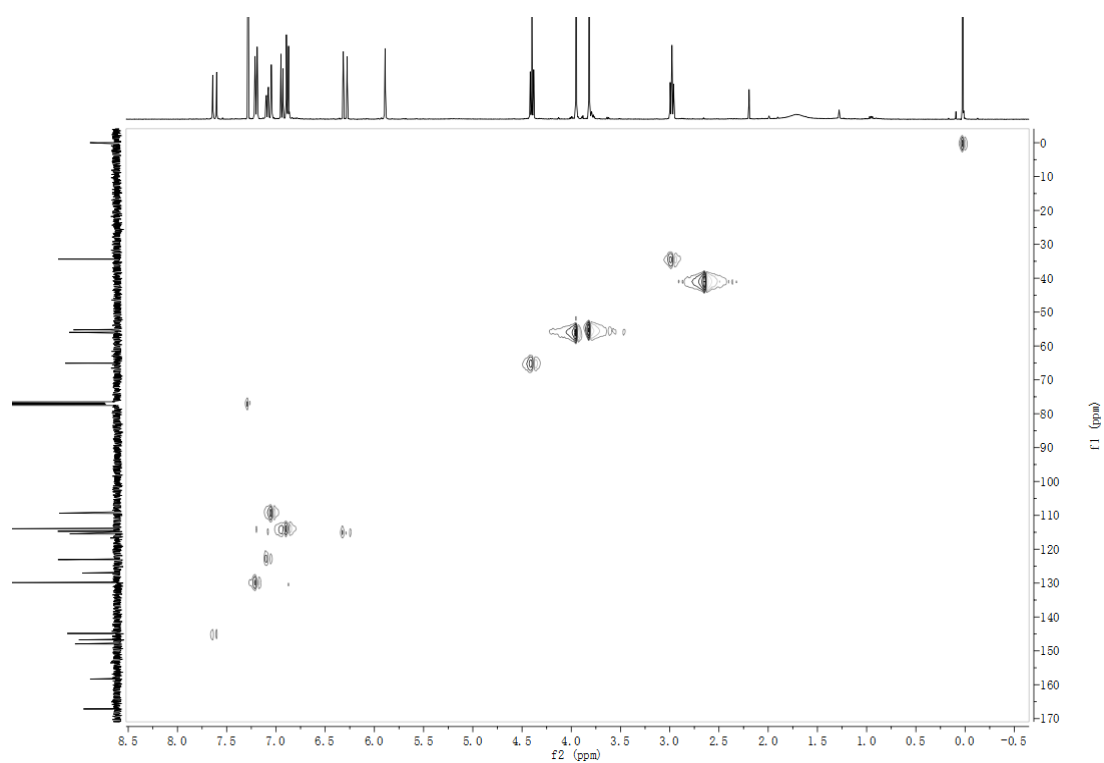

**Figure S16.** HSQC spectrum of **8** in  $\text{CDCl}_3$ .



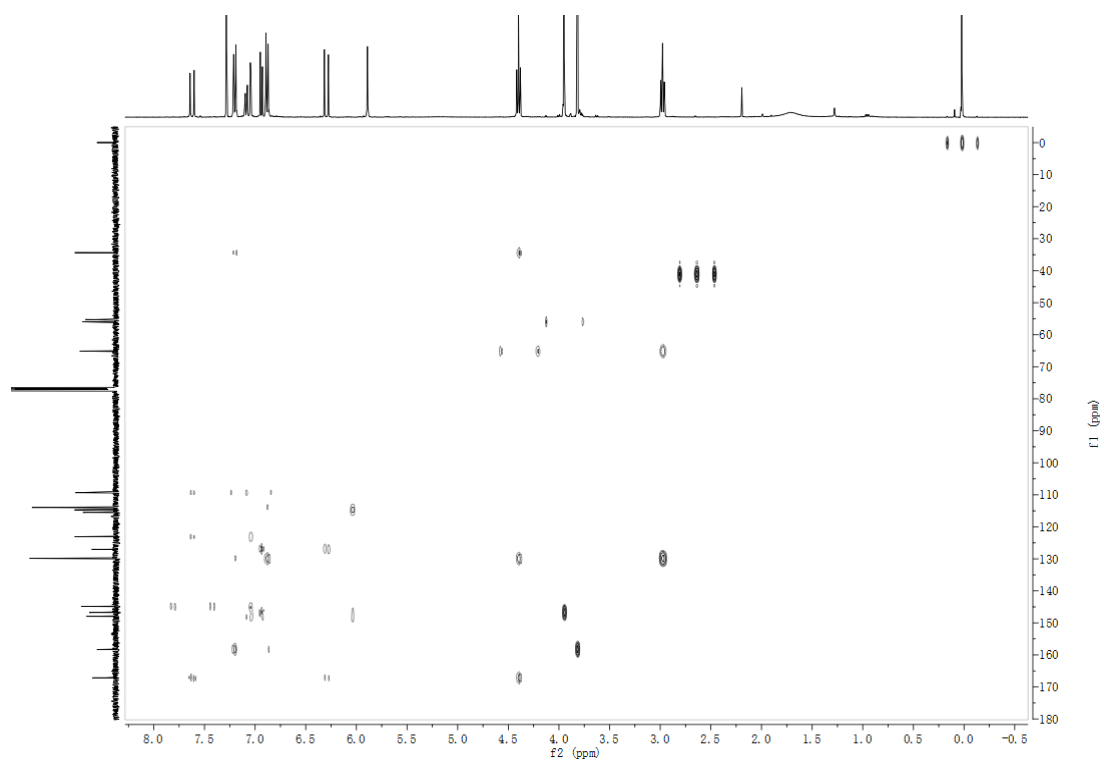

**Figure S17.** HMBC spectrum of **8** in CDCl<sub>3</sub>.

**Table S1.** Precision, accuracy, recovery, and stability of the phenolic acid esters.

| No.      | QC/ $\mu\text{M}$ | Precision RSD(%) |           | Accuracy (%) |           | Recovery (%)      | Stability (%)     |
|----------|-------------------|------------------|-----------|--------------|-----------|-------------------|-------------------|
|          |                   | Intra-day        | Inter-day | Intra-day    | Inter-day |                   |                   |
| <b>1</b> | 5                 | 1.98             | 2.88      | 89.54        | 95.72     | 85.13 $\pm$ 2.45  | 93.56 $\pm$ 1.02  |
|          | 25                | 0.63             | 1.54      | 82.13        | 96.86     | 86.66 $\pm$ 1.33  | 95.65 $\pm$ 0.56  |
|          | 50                | 1.23             | 1.36      | 86.04        | 96.23     | 86.25 $\pm$ 1.17  | 92.25 $\pm$ 1.63  |
| <b>2</b> | 5                 | 2.30             | 1.99      | 89.65        | 92.58     | 85.56 $\pm$ 1.70  | 98.84 $\pm$ 2.09  |
|          | 25                | 1.26             | 2.33      | 96.98        | 101.59    | 80.50 $\pm$ 1.87  | 94.57 $\pm$ 1.85  |
|          | 50                | 1.69             | 2.01      | 96.22        | 93.25     | 83.39 $\pm$ 1.68  | 97.25 $\pm$ 2.09  |
| <b>4</b> | 5                 | 2.03             | 2.35      | 104.24       | 92.27     | 82.28 $\pm$ 1.93  | 92.28 $\pm$ 2.07  |
|          | 25                | 2.20             | 2.14      | 105.16       | 104.15    | 90.41 $\pm$ 1.94  | 100.74 $\pm$ 2.15 |
|          | 50                | 1.28             | 1.35      | 109.74       | 97.14     | 91.97 $\pm$ 1.24  | 95.85 $\pm$ 2.01  |
| <b>5</b> | 5                 | 2.51             | 1.74      | 89.74        | 93.72     | 85.72 $\pm$ 1.49  | 96.29 $\pm$ 0.99  |
|          | 25                | 1.08             | 2.58      | 82.58        | 86.69     | 96.68 $\pm$ 2.49  | 94.56 $\pm$ 0.96  |
|          | 50                | 1.54             | 2.27      | 86.27        | 92.35     | 86.23 $\pm$ 1.96  | 95.85 $\pm$ 1.01  |
| <b>6</b> | 5                 | 1.02             | 2.75      | 89.75        | 93.56     | 85.56 $\pm$ 2.35  | 95.08 $\pm$ 1.56  |
|          | 25                | 1.32             | 2.35      | 96.35        | 98.50     | 90.50 $\pm$ 2.13  | 102.02 $\pm$ 1.96 |
|          | 50                | 1.55             | 2.14      | 96.14        | 101.39    | 89.25 $\pm$ 1.91  | 102.05 $\pm$ 1.39 |
| <b>8</b> | 5                 | 1.47             | 2.86      | 108.87       | 108.07    | 80.18 $\pm$ 2.29  | 93.28 $\pm$ 2.17  |
|          | 25                | 2.01             | 2.51      | 95.80        | 90.41     | 90.14 $\pm$ 2.26  | 95.45 $\pm$ 1.12  |
|          | 50                | 1.69             | 1.97      | 89.74        | 101.14    | 101.79 $\pm$ 2.00 | 102.58 $\pm$ 1.54 |
| <b>9</b> | 5                 | 1.37             | 3.27      | 86.60        | 102.09    | 92.45 $\pm$ 3.02  | 92.26 $\pm$ 2.89  |
|          | 25                | 0.98             | 2.91      | 88.43        | 103.08    | 93.50 $\pm$ 2.72  | 93.71 $\pm$ 1.88  |
|          | 50                | 1.03             | 2.04      | 96.06        | 98.92     | 96.91 $\pm$ 1.98  | 101.99 $\pm$ 1.32 |
